# Supplementary material for: Supramolecular chiroptical switching of helical-sense preferences through the two-way intramolecular transmission of a single chiral source
Source: Royal Society of Chemistry journal article supplement (doi:10.1039/c7ob03057f), 2018-01-01
Supplement: c7ob03057f1.pdf [file c7ob03057f1.pdf]

## Supplementary Information

Supramolecular chiroptical switching of helical-sense preferences through the two-way intramolecular transmission of a single chiral source associated with a dynamic helical loop

Ryo Katoono,\* Keiichi Kusaka, Yuki Tanaka, Kenshu Fujiwara and Takanori Suzuki

*Department of Chemistry, Faculty of Science, Hokkaido University*

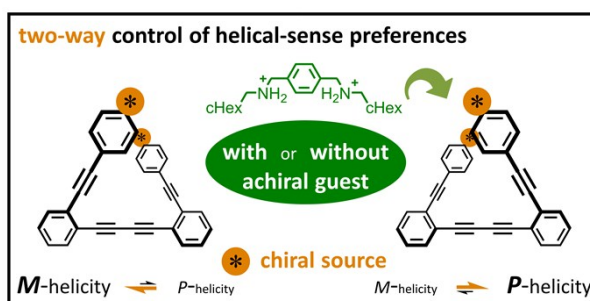

Contents

Supplementary Figures (**Fig. S1-S4**)

S2-S4

Experimental

S4-S6

References and note

S7

## Supplementary Figures

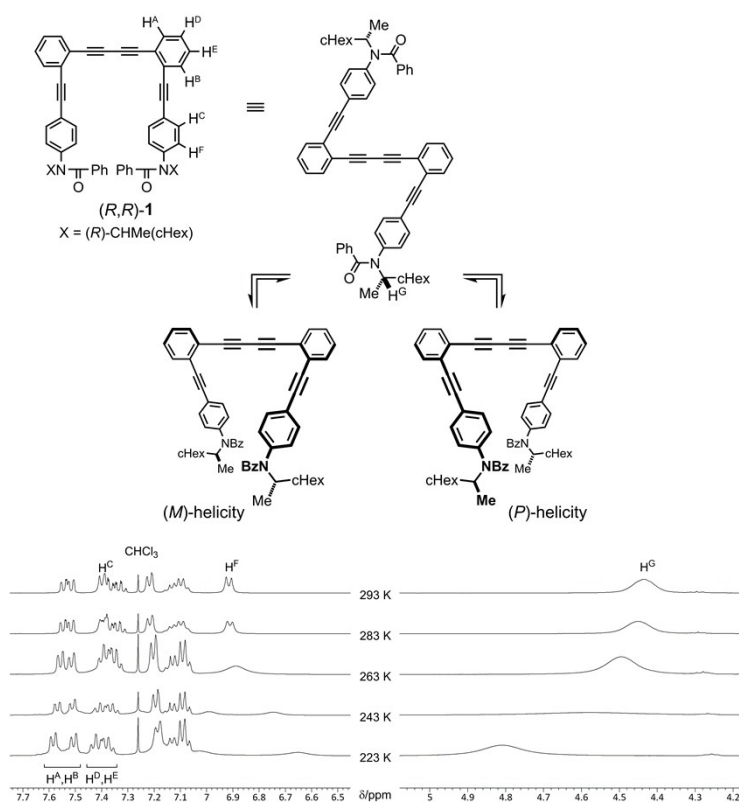

**Fig. S1** Partial <sup>1</sup>H NMR spectra (400 MHz) of (*R,R*)-**1**,<sup>1</sup> measured in chloroform-*d* at 223–293 K.

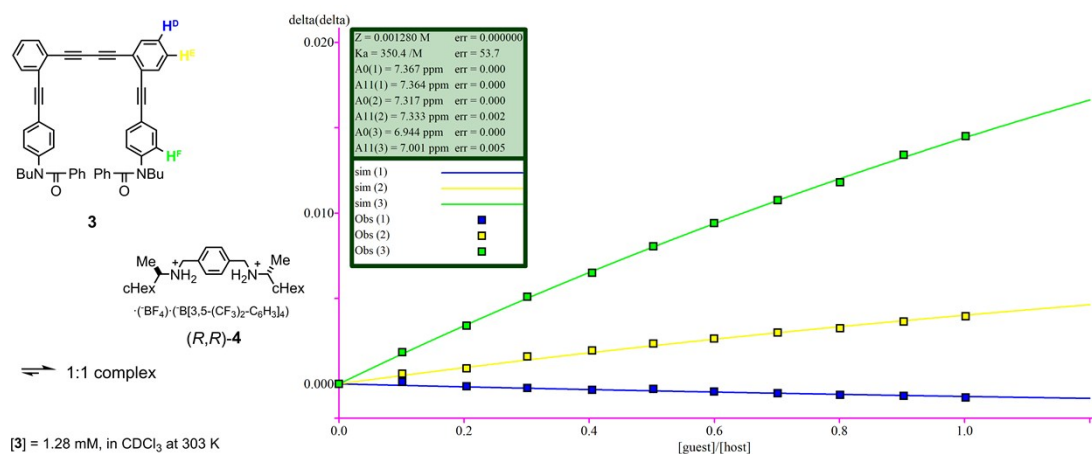

**Fig. S2a** Titration curves for the complexation of **3** with (*R,R*)-**4** and the 1:1 binding constant, obtained by a curve fitting method,<sup>2</sup> based on changes in the chemical shift for protons H<sup>D</sup> (blue), H<sup>E</sup> (yellow) and H<sup>F</sup> (green) upon complexation.

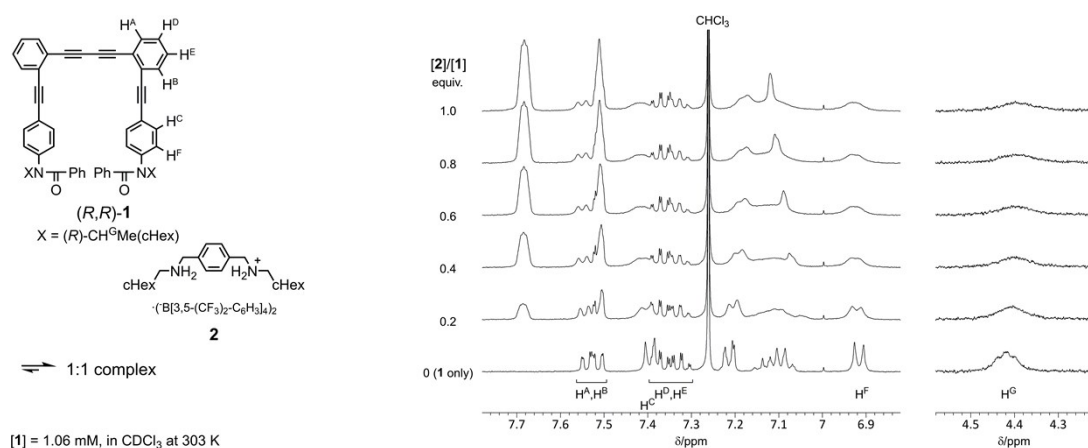

**Fig. S2b** Partial  $^1\text{H}$  NMR spectra (400 MHz) of  $(R,R)$ -**1** ( $[\text{1}] = 1.06 \text{ mM}$ ) in the presence of  $\text{2}^3$  [0 (1 only)-3 equiv.], measured in chloroform-*d* at 303 K.

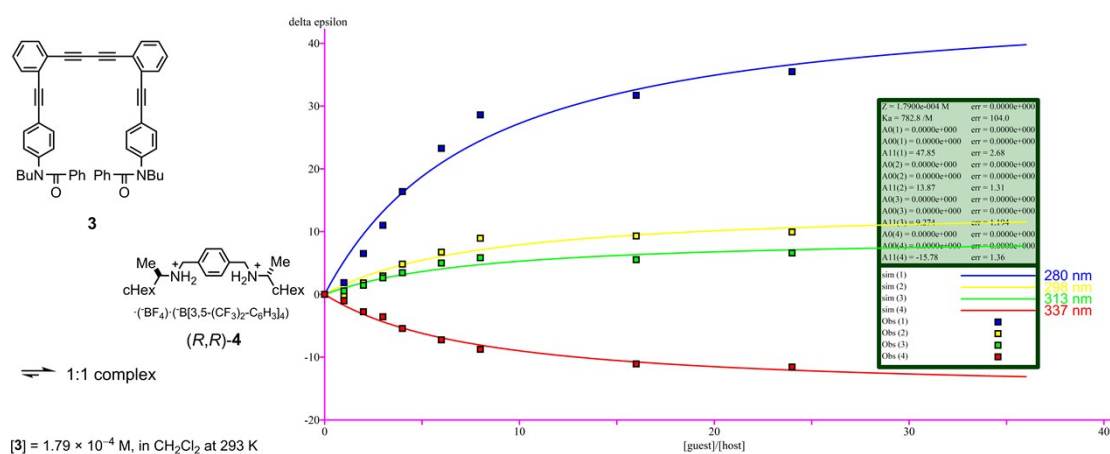

**Fig. S3** Titration curves for the complexation of **3** with  $(R,R)$ -**4** and the 1:1 binding constant, obtained by a curve fitting method,<sup>2</sup> based on changes in the induced CD ( $\Delta\epsilon$ ) at 280 (blue), 298 (yellow), 313 (green) and 337 (red) nm upon complexation.

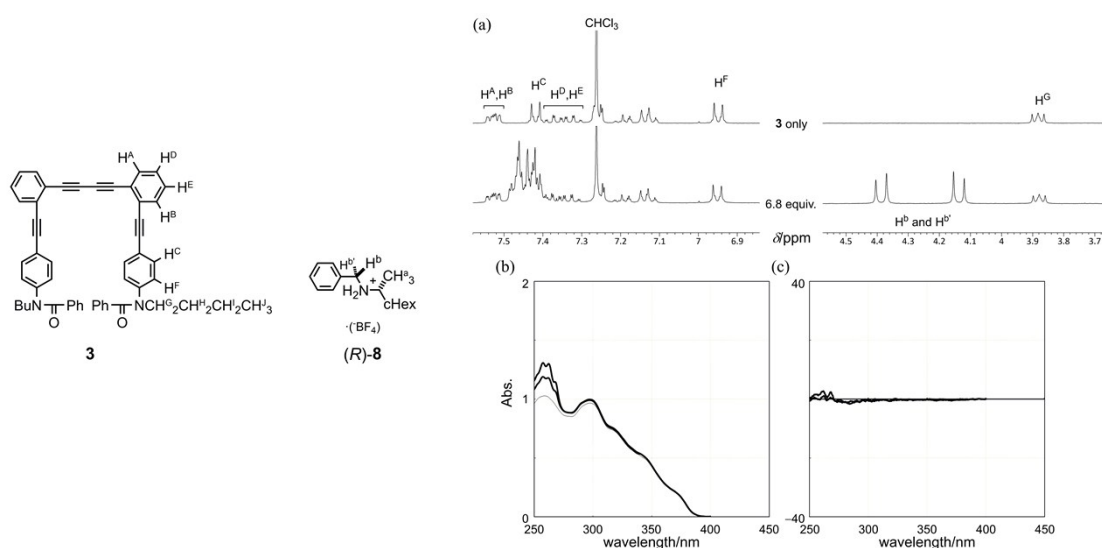

**Fig. S4** (a) Partial  $^1\text{H}$  NMR spectra (400 MHz) of **3** in the presence of a monotopic guest (*R*)-**8**<sup>4</sup> [0 (**3** only) and 6.8 equiv.], measured in chloroform-*d* at 303 K; (b) UV spectrum of **3** ( $1.79 \times 10^{-4}$  M) in the presence of (*R*)-**8** [0 (**3** only, thin line), 8 and 16 (bold lines) equiv.]; (c) CD spectra of **3** ( $1.79 \times 10^{-4}$  M) in the presence of (*R*)-**8** (8 and 16 equiv.). UV and CD spectra were measured in dichloromethane at room temperature.

## Experimental

### Preparation of **3**

To a solution of **6**<sup>1</sup> (183 mg, 0.731 mmol) and **7b**<sup>5</sup> (824 mg, 1.90 mmol) in THF/Et<sub>3</sub>N (7 mL/7 mL) were added Pd(PPh<sub>3</sub>)<sub>4</sub> (45 mg, 0.039 mmol) and CuI (13 mg, 0.068 mmol) at room temperature under an argon atmosphere, and the mixture was stirred at 50 °C for 20 hours. After removal of a solid by filtration, the filtrate was concentrated and purified by column chromatography on SiO<sub>2</sub> (ethyl acetate/dichloromethane/hexane), followed by GPC (chloroform) to give **3** (470 mg) as a yellow solid in 75% yield. An analytical sample was obtained as a white solid by recrystallization from ethanol. **3**: mp 139-140 °C; elemental analyses Found: C, 86.11; H, 6.10; N, 3.69. Calc. for C<sub>54</sub>H<sub>44</sub>N<sub>2</sub>O<sub>2</sub>: C, 86.14; H, 5.89; N 3.72%; IR (KBr)  $\nu_{\text{max}}/\text{cm}^{-1}$  3059, 2959, 2928, 2860, 2215, 1644, 1599, 1510;  $^1\text{H}$  NMR  $\delta_{\text{H}}$ (400 MHz, CDCl<sub>3</sub>, Me<sub>4</sub>Si)/ppm 7.54-7.51 (4H, m), 7.42 (4H, d,  $J = 8.8$  Hz), 7.37 (2H, dt,  $J = 1.2$ , 7.6 Hz), 7.32 (2H, dt,  $J = 1.6$ , 7.6 Hz), 7.27-7.25 (4H, m), 7.22-7.17 (2H, m), 7.15-7.11 (4H, m), 6.95 (4H, d,  $J = 8.8$  Hz), 3.88 (4H, t,  $J = 7.6$  Hz), 1.61-1.53 (4H, m), 1.39-1.29 (4H, m), 0.90 (6H, t,  $J = 7.6$  Hz);  $^{13}\text{C}$  NMR  $\delta_{\text{C}}$ (100 MHz, CDCl<sub>3</sub>)/ppm 170.1, 143.7, 136.0, 132.6, 132.6, 131.6, 129.6, 129.0, 128.6, 128.1, 127.8, 127.4, 126.8, 124.4, 120.9, 93.5, 88.5, 81.4, 77.8, 50.1, 29.8, 20.1, 13.8; FD-LRMS  $m/z$  755.3 ([M+3]<sup>+</sup>, 4%), 754.2 ([M+2]<sup>+</sup>, 19), 753.2 ([M+1]<sup>+</sup>, 61), 752.2 (M<sup>+</sup>, 100); UV  $\lambda_{\text{max}}$ (CH<sub>2</sub>Cl<sub>2</sub>)/nm (log  $\epsilon$ ) 372 (sh, 4.03), 346 (sh, 4.42), 319 (sh, 4.60), 297 (4.73), 259 (4.76).

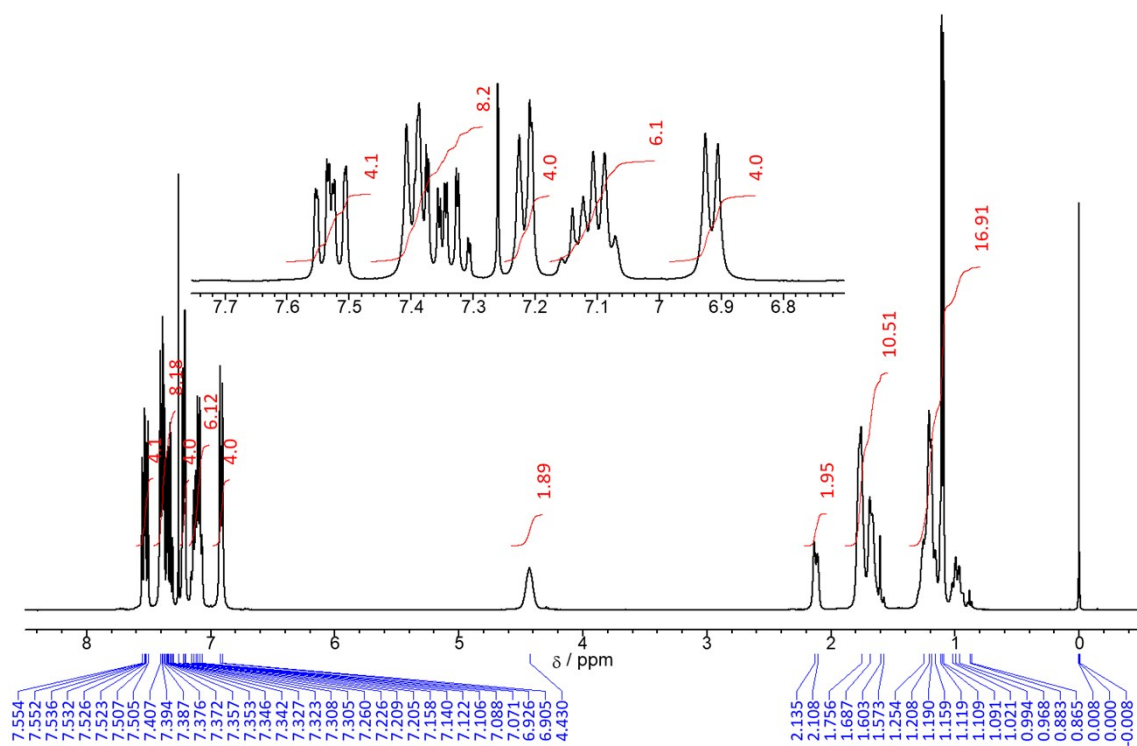

<sup>1</sup>H NMR (400 MHz) spectrum of (*R,R*)-1, measured in chloroform-*d* at room temperature.<sup>1</sup>

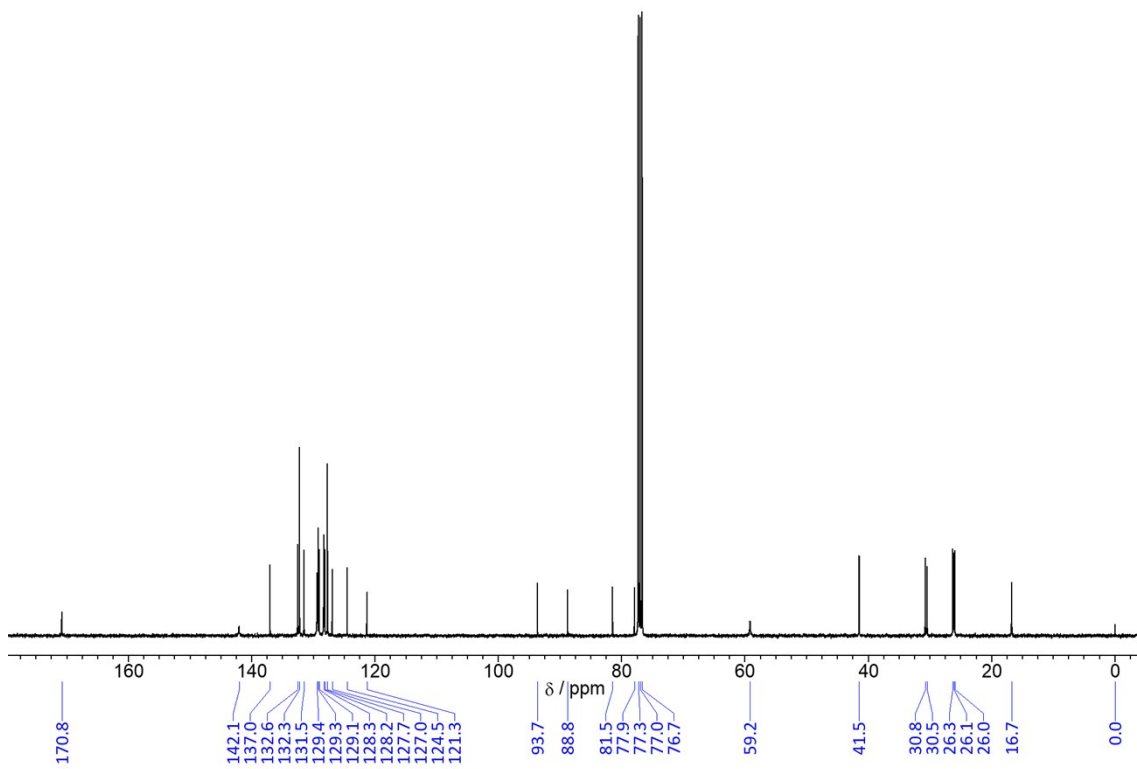

<sup>13</sup>C NMR (100 MHz) spectrum of (*R,R*)-1, measured in chloroform-*d* at room temperature.<sup>1</sup>

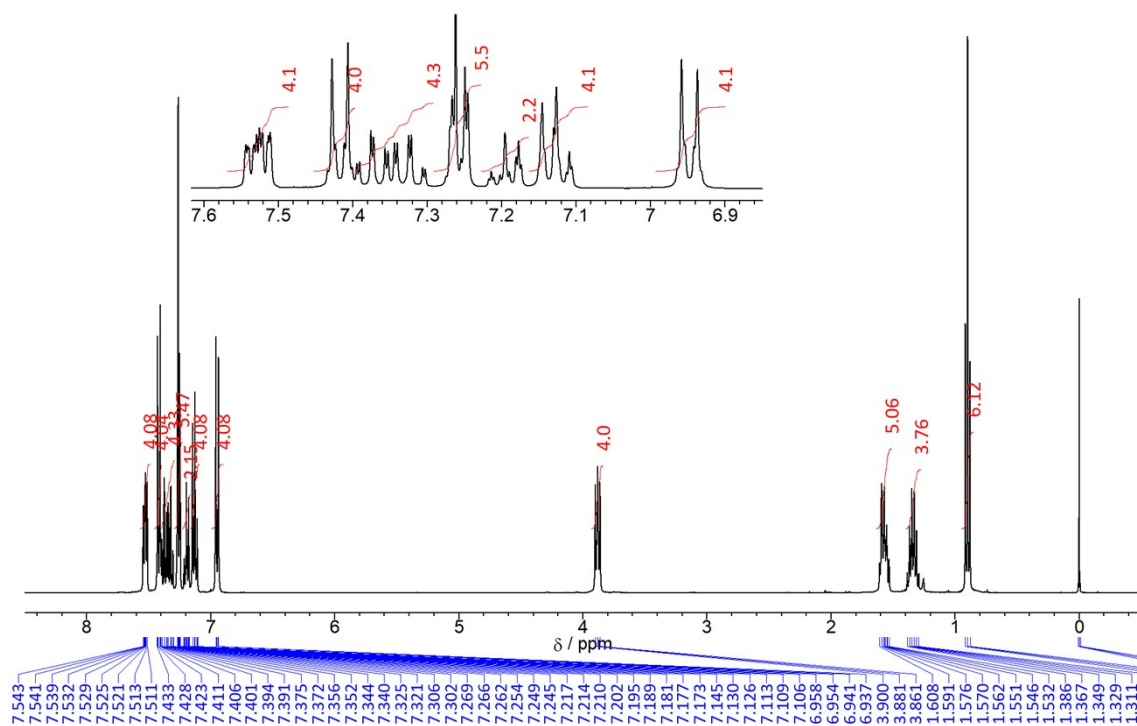

$^1\text{H}$  NMR (400 MHz) spectrum of **3**, measured in chloroform-*d* at room temperature.

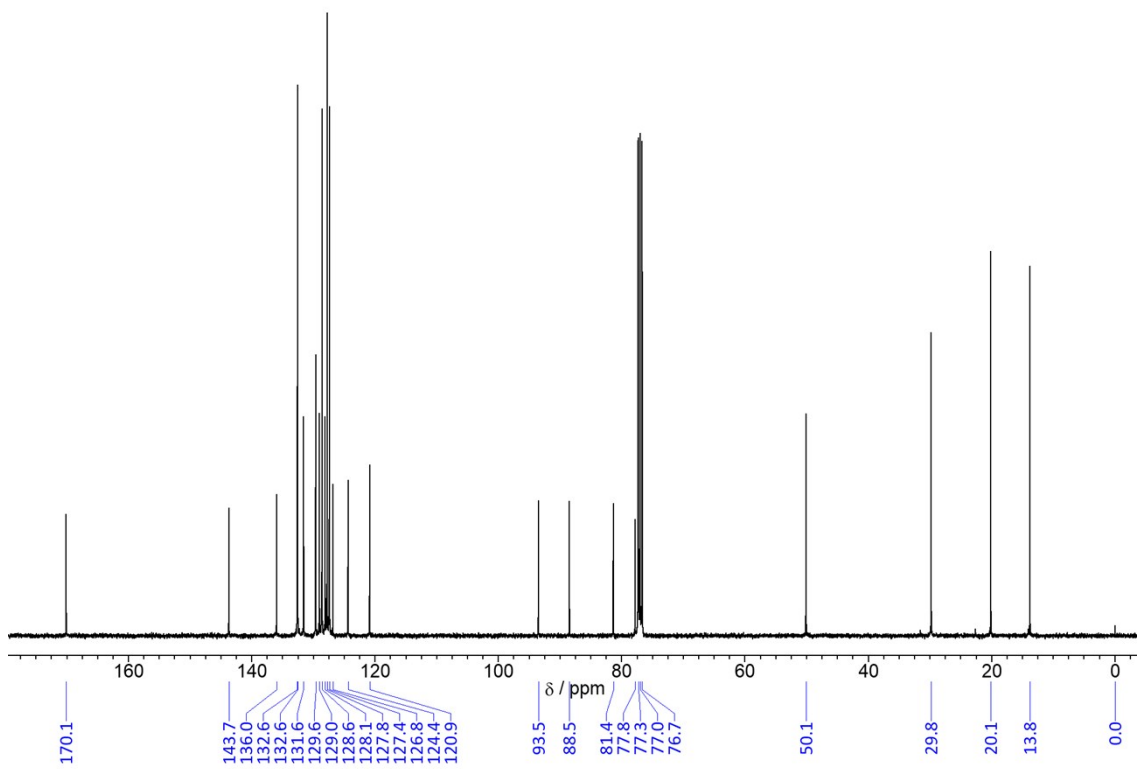

$^{13}\text{C}$  NMR (100 MHz) spectrum of **3**, measured in chloroform-*d* at room temperature.

#### References and note

- 1 R. Katoono, Y. Tanaka, K. Kusaka, K. Fujiwara and T. Suzuki, *J. Org. Chem.*, 2015, **80**, 7613–7625.
- 2 S. Akine, TitrationFit, program for analyses of host-guest complexation, Kanazawa University, Kanazawa, Japan, 2013.
- 3 R. Katoono, K. Kusaka, S. Kawai, Y. Tanaka, K. Hanada, T. Nehira, K. Fujiwaraa and T. Suzuki, *Org. Biomol. Chem.*, 2014, **12**, 9532–9538.
- 4 R. Katoono, H. Kawai, K. Fujiwara and T. Suzuki, *J. Am. Chem. Soc.*, 2009, **131**, 16896–16904.
- 5 R. Katoono, K. Fujiwara and T. Suzuki, *Chem. Commun.*, 2014, **50**, 5438–5440.
